# Supplementary material for: Transmission potential of human schistosomes can be driven by resource competition among snail intermediate hosts
Source: PubMed Central journal article supplement — Proc Natl Acad Sci U S A. 2022 Feb 4;119(6):e2116512119. doi: 10.1073/pnas.2116512119 (PMC8833218; doi:10.1073/pnas.2116512119), 2022-02-04
Supplement: pnas.2116512119.sapp.pdf [file pnas.2116512119.sapp.pdf]

1 **Appendix for “Transmission potential of human schistosomes is driven by resource**  
2 **competition among snail intermediate hosts”**

3  
4 David J. Civitello, Karena H. Nguyen, Rachel B. Hartman, Andres Manrique, Bryan K. Delius,  
5 LM Bradley, Roger M. Nisbet, and Jason R. Rohr  
6

7  
8 **Appendix contents**  
9

- 10 • Description of the modeling scenario  
11 • Description of model simulation schedule  
12 • Description of the individual-based model (IBM) of algae-snail-schistosome dynamics  
13 • Description of the SEI model  
14 • Additional discussion of IBM results  
15 • Figures S1-S2  
16 • Tables S1-S3  
17  
18

19 Scenario description and individual-based model overview

20 The simulations presented here correspond to the design of the mesocosm experiment and  
21 aim to represent ecologically realistic scenarios of seasonal schistosome transmission sites, e.g.  
22 (1, 2). Simulations were initialized with conditions reflecting the design of the mesocosm  
23 experiment, i.e., an initial a population of 60 snails in a 500-L environment and continued for  
24 120 days. Miracidia were introduced at a constant-daily introduction rate, transmission  
25 parameters were estimated from experimental exposures (3), and host and parasite dynamic  
26 energy budget (DEB) parameters were estimated from experiments on manipulated resource  
27 supply rates and periodic starvation periods (4).

28  
29 Simulation schedule

30 We implemented the model with discrete daily time steps. We initialized the snail  
31 populations with 60 individuals, with body lengths drawn from a uniform distribution ranging  
32 from 2 – 16 mm. Initially, the environment has an algal resource density of 1 mg Carbon L<sup>-1</sup>, and

33 no miracidia or cercariae. At the beginning of each step, miracidia are introduced into the water  
34 and a discrete stochastic transmission model determines if any snails become infected by the  
35 population of free-living schistosome miracidia. The transmission model explicitly represents  
36 exposure (irreversible contact) and infection probability given exposure for each miracidium.  
37 Miracidia that fail to contact a snail may survive to the next day. All miracidia that fail to infect  
38 following a contact die. Successful infections add parasite biomass to an individual snail's DEB  
39 model. Next, each susceptible and infected snail follows its own DEB model for resource  
40 consumption, growth, reproduction, survival, and production of parasite cercariae (4-6). Algal  
41 resources grow logistically and are consumed by all snails in the population. The DEB and  
42 resource models are integrated over the duration of the time step. If, over a timestep, a snail has  
43 allocated sufficient energy to produce a whole number of eggs or cercariae, they are released into  
44 the environment on the day of production. The survival of each snail is then determined as a  
45 probabilistic outcome based on the snail's current mortality hazard. Snail eggs hatch with a 10-  
46 day time lag from laying date, contributing new individuals (with initial length 0.75 mm) to the  
47 population. Finally, all snail and environmental quantities are updated at the end of each daily  
48 step.

49  
50

#### 51 Full description of the individual-based model of algae-snail-schistosome dynamics

52  
53

54 We previously built an individual-based epidemiological model for the human  
55 schistosome, *S. mansoni*, infecting a size-structured *B. glabrata* host population (7, 8). The  
56 model is composed of three connected submodules: 1) a within-host dynamic energy budget  
57 (DEB) model for *B. glabrata* host biomass and *S. mansoni* parasite biomass (4-6), 2) a between-  
58 host transmission model that describes infection following contact between hosts and

58 schistosome miracidia, the free-living life stage, excreted by humans into freshwater  
59 environments of miracidia and snails (3), and 3) a resource production model representing  
60 logistically growing periphytic algae.

### 61 Within-host dynamic energy budget and resource production model

62 The DEB model used to represent each snail builds on the “standard model” of DEB  
63 theory (9). It uses ordinary differential equations to track changes in the density of logistically-  
64 growing food resources,  $F$ , in the environment shared by all snails (with each snail distinguished  
65 with the subscript  $i$ ) as well as several host traits: physical length,  $L_i$  (shell diameter; assumed to  
66 be proportional to the cube root of structural biomass); the scaled density of energy reserves,  $e_i$ ;  
67 and resources that have been committed to development,  $D_i$ , or reproduction,  $R_{Hi}$ . We extended  
68 the standard DEB model by adding two modules that track a within-host population of parasites  
69 and host survival, respectively. Within each host, we track the change in parasite biomass,  $P_i$ ,  
70 and the resources that have been invested in parasite reproduction,  $R_{Pi}$ . To model mortality, we  
71 introduced a variable represented the scaled density of repairable “damage”,  $\delta$ , as well as an  
72 instantaneous hazard rate for mortality,  $H_i$ , which increases proportionally to damage. The model  
73 structure is presented in Equations 1 – 10 below. State variables, parameters are listed in Table  
74 S1. Several derived parameters, functions, or equalities simplify the presentation of the model  
75 and are also listed in Table S1. Subscripts  $H$  and  $P$  distinguish host and parasite variables and  
76 parameters. All parameter values used in this simulation study are defined in Table S2. Overall,  
77 this model generically represents the consumption of host energy for growth and the production  
78 and release of infectious propagules while providing a parsimonious description of prominent  
79 phenomena in snail-schistosome physiology, e.g., potential for reproductive manipulation,

80 castration, and gigantism. A full derivation of the survival module along with discussion and  
 81 justification of the parasitism module are presented in (4, 5).

$$82 \quad \frac{dF}{dt} = r \left(1 - \frac{F}{K}\right) - i_M f_H \sum_i^N L_i^2 \quad (\text{Eq. 1})$$

$$83 \quad \frac{dL_i}{dt} = \frac{gY_{VE}}{3\chi} \left( \frac{\kappa_i^* a_M e_i - (m_V + m_R E_M \delta_i) \chi L_i}{g + e_i} \right) \quad (\text{Eq. 2})$$

$$84 \quad \frac{de_i}{dt} = \frac{a_M}{\chi E_M L_i} (f_H - e_i) - \frac{i_{PM} f_P P_i}{E_M \chi L_i^3} \quad (\text{Eq. 3})$$

$$85 \quad \frac{dD_i}{dt} = \begin{cases} (1 - \kappa_i^*)C - m_D D_i & \text{if } D_i < D_R \\ \min((1 - \kappa_i^*)C - m_D D_i, 0) & \text{if } D_i \geq D_R \end{cases} \quad (\text{Eq. 4})$$

$$86 \quad \frac{dR_{Hi}}{dt} = \begin{cases} 0 & \text{if } D_i < D_R \\ \max((1 - \kappa_i^*)C - m_D D_i, 0) & \text{if } D_i \geq D_R \end{cases} \quad (\text{Eq. 5})$$

$$87 \quad \frac{dP_i}{dt} = (Y_{PE} i_{PM} f_P (1 - r_{Pi}) - m_P) P_i \quad (\text{Eq. 6})$$

$$88 \quad \frac{dR_{Pi}}{dt} = \gamma_{RP} Y_{PE} i_{PM} f_P r_{Pi} P_i \quad (\text{Eq. 7})$$

$$89 \quad \frac{d\delta_i}{dt} = \frac{\Theta}{\chi L_i^3} \frac{dR_{Pi}}{dt} + k_R (1 - e_i) - k_R \delta_i - \frac{3\delta_i}{L_i} \frac{dL_i}{dt} \quad (\text{Eq. 8})$$

$$90 \quad \frac{dH_i}{dt} = h_b + h_\delta \max(\delta_i - \delta_0, 0) \quad (\text{Eq. 9})$$

$$91 \quad \text{Prob}(\text{Survival})_i[t] = e^{-H_i(t)} \quad (\text{Eq. 10})$$

92 Snail hosts consume logistically growing algal food resources,  $F$ , with a Type-II scaled  
 93 functional response,  $f_H$ , with half saturation constant,  $F_h$ , and a surface area ( $L_i^2$ )-dependent  
 94 maximum ingestion rate,  $i_M$  (Eq. 1; Table S1). Logistic growth of algal resources and  
 95 consumption of algae by the snail population fully specifies the resource production module of

96 the IBM. Hosts assimilate food into energy reserves, with yield  $Y_{EF}$ . The maximum assimilation  
97 rate,  $a_M$ , is the product of the maximum ingestion rate and the yield of reserves on food. Hosts  
98 use reserve energy to build two types of biomass: somatic structure (which performs vital  
99 functions and requires maintenance at rate  $m_V$ ), and reproductive matter (reserve which has been  
100 irreversibly committed to gametes). Reserve mobilization increases linearly with reserve density  
101 (9). Hosts allocate a constant portion,  $\kappa$ , of mobilized reserves,  $C_i$ , to somatic (vs. reproductive)  
102 processes. Hosts grow in length based on the yield of structure on reserves,  $Y_{VE}$ , and the energy  
103 mobilized for somatic processes minus the costs of somatic maintenance and repair (Eq. 2).  
104 Juveniles use energy allocated to “reproduction” for development,  $D_i$  (Eq. 4). Reproduction  
105 begins after maturing above the developmental threshold for reproduction,  $D_R$ , and  
106 developmental status requires maintenance at the specific rate  $m_D$ .

107         If infected, a population of parasites grows within the host and consumes host reserves  
108 (Eq. 3). Parasite biomass,  $P_i$ , (Eq. 6) increases through parasite ingestion and assimilation of host  
109 reserves, also following a Type-II scaled functional response,  $f_P$ , with a half saturation  
110 coefficient,  $e_h$ , maximum mass-specific ingestion rate,  $i_{PM}$ , and yield of parasite biomass on host  
111 reserve,  $Y_{PE}$ . Parasite biomass requires maintenance at mass-specific rate  $m_P$ . A proportion,  $r_{Pi}$ ,  
112 of the assimilated reserve is allocated to parasite reproduction, while the rest is allocated to  
113 parasite biomass growth. The allocation proportion  $r_{Pi}$  itself increases as a sigmoid function of  
114 parasite density within the physical volume of the snail host’s shell, with an inflection point at  $p_h$   
115 (Table S1), reflecting within-host density dependence in parasite growth. Biomass of parasite  
116 offspring (cercariae) increases from parasite allocation to reproduction, with the relative yield of  
117 parasite reproduction biomass on assimilated reserve,  $\gamma_{RP}$ . Infection can also alter the host’s  
118 realized allocation between soma and reproduction,  $\kappa_i^*$ , with parasite density dependent

119 manipulation rate,  $\alpha$ , yielding an effective allocation rule,  $\kappa_i^* = \min(\kappa + \alpha P_i, 1)$ . This  
120 expression, using the minimum function, represents the assumption that increased parasite  
121 biomass increases the somatic allocation proportion, but, by definition as a proportion, this  
122 allocation fraction can never exceed 1. Schistosome infection increases  $\kappa_i^*$  in snails, therefore it  
123 can cause parasitic castration, the rapid termination of reproduction by infected hosts, and host  
124 gigantism, the temporarily increased growth of infected hosts relative to uninfected hosts,  
125 phenomena that are prominent in snail-trematode interactions and also seen across a variety of  
126 host-parasite systems (10, 11).

127 Resource consumption by parasites and uninfected competitors can cause focal hosts to  
128 starve, therefore, we incorporated a “shrinking and regression” rule to describe the physiological  
129 consequences of hosts being unable to pay somatic or reproductive maintenance costs. Snails  
130 lose structural mass (although their shells do not shrink) if reserves mobilized to soma cannot  
131 cover somatic maintenance. Similarly, hosts halt reproduction and regress developmentally if  
132 reserves mobilized to reproduction are insufficient to pay for developmental maintenance (4).

133 Hosts die at a background rate and from damage caused by low energy reserve density or  
134 emerging parasite offspring. Scaled damage density,  $\delta_i$ , increases due to the release of parasite  
135 offspring with damage intensity,  $\Theta$ . The damage repair rate,  $k_R$ , determines the rate of damage  
136 caused by reserve depletion and damage repair. Damage density also decreases through dilution  
137 by growth and may be concentrated by shrinkage (Eq. 8). Snail hosts can repair damage, which  
138 requires energy, and we assume that these costs,  $m_R$ , are an explicit portion of somatic  
139 maintenance (i.e., these costs must be paid fully before mobilized reserves can fuel somatic  
140 growth). Cumulative hazard,  $H_i$ , increases with the background hazard rate,  $h_b$ , and a linear  
141 function of damage density above a threshold,  $\delta_0$ , with hazard coefficient  $h_\delta$  (Eq. 9). Host

142 survival probability,  $Prob(Survival[t])_i$  is a negative exponential function of cumulative hazard,  
143  $H_i$ , (Eq. 10).

144 Between host transmission model

145 Snail hosts can be infected following density-dependent contact with free-living  
146 miracidia following a model that separates the transmission process into two components:  
147 irreversible exposure of hosts to parasites in the water (i.e., invasion of host tissues by a parasite,  
148 at rate  $\varepsilon$ ) and a per miracidium probability of infection given exposure,  $\sigma$  (3). We assume that  
149 miracidia are introduced into the aquatic environment at a constant daily rate,  $M_{in}$ , and that  
150 parasites in the water die at a background mortality rate,  $m_M$ . A successful snail infection adds  
151 the carbon biomass of a single miracidium ( $2.85 \times 10^{-5}$  mg C) to the parasite biomass  
152 compartment,  $P_i$ , of that specific host's DEB model (Eq. 6). If the host was previously  
153 uninfected, this event can effectively be viewed as "turning on" the parasite submodel within the  
154 energy budget. Thereafter, within-host energy consumption, parasite biomass accumulation,  
155 parasite reproduction, and parasite-mediated damage can occur. The transmission is implemented  
156 as a stochastic realization of a single day simulation within the IBM at the start of each daily  
157 time step. For each miracidium present in the water, there are three potential outcomes: 1)  
158 successful snail infection, 2) death following host infection or in the water, or 3) survival in the  
159 water until the next day. Given these parameters, along with densities of snail hosts,  $S$ , and  
160 miracidia,  $M$ , the transmission model implies the following probability that a miracidium infects  
161 snail  $i$  in a time interval spanning time = 0 through time =  $t$ .

162 
$$Probability(Infection)[t]_i = \frac{\sigma\varepsilon}{m_M + \varepsilon S} 1 - e^{-(\varepsilon S + d_M)t} \quad (Eq. 11)$$

163 We note first that here,  $e$ , represents Euler's constant, and not  $e_i$ , the scaled reserve density of  
164 snail  $i$ . Second, this representation, where snail infection probability is a decreasing function of

165 snail density,  $S$ , reflects the biological reality that irreversible exposure (regardless of infection  
166 success or failure) removes parasites from the environment and that any one parasite can only  
167 invade a single host (3).

168 Some parasites that do not invade a snail host can survive to the next daily time step. The  
169 transmission model implies the following probability for this occurrence:

$$170 \quad \text{Probability}(\text{Miracidium survives in the water})[t] = e^{-(\varepsilon S + m_M)t} \quad (\text{Eq. 12})$$

171 Again, in this equation,  $e$ , represents Euler's constant, and not  $e_i$ , the scaled reserve density of  
172 snail  $i$ .

173 Miracidia that fail to infect a snail following irreversible exposure or to survive in the  
174 aquatic environment die. The transmission model implies the following probability for miracidial  
175 mortality in a time interval spanning time = 0 through time =  $t$ :

$$176 \quad \text{Probability}(\text{Miracidium dies})[t] = \left( \frac{m_M}{m_M + \varepsilon S} + \frac{(1-\sigma)\varepsilon S}{m_M + \varepsilon S} \right) (1 - e^{-(\varepsilon S + m_M)t}) \quad (\text{Eq. 13})$$

177 In Eq. 13 the two terms within the first quantity represent the two different sources of mortality,  
178 death in the water without invading a snail and death after snail invasion, respectively. The  
179 second quantity represents the probability of a miracidium not remaining alive in the water at  
180 time  $t$ . Formally, this expression could be simplified by combining these terms, but we retain this  
181 presentation to make the biological interpretation more apparent.

182 The stochastic outcome of a single timestep of the transmission module occurs by  
183 simulating a single draw from a multinomial distribution where the probability of "success" for  
184 all events are described as above and the number of "trials" is equal to the number of miracidia  
185 in the environment.

186

187 Susceptible-Exposed-Infectious model of snail-schistosome dynamics



188 We contrast the predictions and assumptions of the DEB-based IBM against an  
189 Susceptible-Exposed-Infectious (SEI) model of snail-schistosome dynamics that ignores the  
190 effect of resources of the production of schistosome cercariae. There is no singular model that is  
191 uniformly applied to schistosome transmission dynamics. However, many widely used models  
192 are variations on a core structure that represent several assumptions: 1) snail populations grow  
193 logistically (i.e., there is implicit competition among snail hosts that reduces per capita  
194 reproductive rates), 2) snail infections arise from density-dependent transmission following  
195 contact with miracidia. However, sometimes miracidia are abstracted away from these models  
196 and the transmission rate to snails is considered to depend on the density of susceptible snails  
197 and the number of adult worms within human hosts. Formally, this introduces the additional  
198 assumption that per-schistosome reproduction within humans is density independent, 3) snails  
199 transition from the susceptible class to the exposed class (reflecting pre-patent (i.e., non-  
200 shedding infections). After the pre-patent period, snails transition from the exposed class to the  
201 infectious class, 4) infectious snails release cercariae at a constant rate and suffer the virulent  
202 effects of schistosome infection; reduced survival and fecundity, and 5) transmission rate to  
203 humans depends on the density of cercariae and humans. Again, because of the assumption that  
204 all infectious snails release cercariae at a constant rate, cercariae are often abstracted out of these  
205 models, and transmission rate to humans is considered to depend on the density of infectious  
206 snails and humans. Taking these assumptions together yields a generic SEIC (Susceptible-  
207 Exposed-Infectious-Cercariae) model for snail-schistosome dynamics that represents the  
208 dominant perspective of the aquatic ecology of schistosomes:

209 
$$\frac{dS}{dt} = b \left( 1 - \left( \frac{(S+E+I)}{K} \right) \right) (S + E) - mS - \beta MS \quad (\text{Eq. 14})$$

210 
$$\frac{dE}{dt} = \beta MS - (m + \sigma)E \quad (\text{Eq. 15})$$

211 
$$\frac{dI}{dt} = \sigma E - (m + m_I)I \quad (\text{Eq. 16})$$

212 
$$\frac{dC}{dt} = \lambda I - m_C C \quad (\text{Eq. 17})$$

213 Snails reproduce negative density dependence, resulting in logistic population growth  
214 with maximum per capita reproduction rate,  $b$ , and carrying capacity,  $K$  (Eq. 14). Only  
215 susceptible,  $S$ , and exposed,  $E$ , snails reproduce, as schistosome infections castrate infectious  
216 snails,  $I$ . All snail hosts regardless of infection status contribute to competitive effects on  
217 reproduction. Susceptible snails die, at background mortality rate  $m$ , and they become infected  
218 upon density dependent infection with miracidia. Here we represent a constant introduction rate  
219 of miracidia by humans and all aspects of the ensuing transmission process with a single  
220 compound parameter,  $\beta M$ . Snails that have been successfully invaded by miracidia transition to  
221 the exposed class,  $E$ , and they die at the same background mortality rate as susceptible snails,  $m$ .  
222 Additionally, exposed (pre-patent) snails transition to the infectious (patent) class at a constant  
223 rate,  $\sigma$  (Eq. 15). Infectious snails die with an additional death rate due to schistosome infection,  
224  $m_I$  (Eq. 16) and they release human-infectious cercariae into the environment at a constant per  
225 capita rate,  $\lambda$  (Eq. 17). Cercariae in the environment die at a constant death rate,  $m_C$ . All state  
226 variables and parameters are defined in Table S3.

227 Here we focus on the dynamics of snails and schistosomes and consider (as for the IBM)  
228 scenarios where introduction of miracidia occurs at a constant rate to focus on the “within  
229 season” aquatic dynamics and ecology of this system. We explicitly model cercarial dynamics to  
230 facilitate direct comparisons to predictions from the IBM. While this model is representative of  
231 generic aquatic dynamics that reflect past and current schistosomiasis modeling efforts, it is

232 important to acknowledge that there are a variety of important extensions and elaborations to  
233 these models, especially those that consider variation in human demography, behavior, immune  
234 status, and various control methods (12-14), which are all complementary to the focus on aquatic  
235 dynamics presented here.

236

### 237 Additional simulation and discussion of the IBM

238 In Figure 1, we presented the dynamics resulting from a single run of the IBM to contrast  
239 against the predictions generated by the SEI model. Here, we present additional simulation  
240 results to evaluate whether the key predictions from the IBM are robust to 1) temporal variation  
241 in miracidial introduction, and 2) variation to two key parameters, the rate of miracidial  
242 introduction,  $M_{In}$ , and the maximum growth rate of algal resources,  $r$ .

243 First, we ran 50 replicate simulations as described in the main text (with a constant rate of  
244 miracidial input;  $M_{In} = 10 \text{ d}^{-1}$ ). We then ran another set of 50 simulations in which miracidia  
245 were introduced to the environment on a biweekly schedule, as in the experiment, only on days  
246 1, 15, 29, and 43. We set  $M_{In} = 140 \text{ d}^{-1}$  on these four dates and we set  $M_{In} = 0 \text{ d}^{-1}$  at all other  
247 times to standardize the same input of miracidia over the first eight weeks of the simulation. We  
248 then plotted the dynamics of snails, cercariae, and algal resources through time (Figure S1). The  
249 main dynamics of these scenarios are extremely similar. Both predict an intense pulse in  
250 cercarial production as snail populations grow followed by essentially no parasite release once  
251 the snail populations suppress algal resources and begin to decline. The scenario representing  
252 biweekly pulses of miracidial introduction caused a slight acceleration in the onset of the  
253 cercarial pulse and an increase in the duration and peak of this pulse of cercarial density. This  
254 occurred because this scenario caused snails to become infected slightly earlier on average,

255 thereby enabling snails to begin releasing cercariae earlier and with a longer period of time  
256 before snail suppression of algal resource availability and starvation-induced cessation of  
257 cercarial production.

258         Next, we retained the constant miracidial input rate  $M_{In}$ , and explored how variation in  
259 this rate and the growth rate of algal resources,  $r$ , affect the snail-schistosome dynamics  
260 predicted by the IBM. Over a gradient of  $1 \leq M_{In} \leq 10000 \text{ d}^{-1}$ , the model predicts that increased  
261 miracidial introduction increases the number of infected snails and therefore the total production  
262 of schistosome cercariae (Figure S2). At all input rates, the model maintains the prediction of a  
263 cercarial pulse, in contrast to models that ignore the effects of resources on cercarial production.  
264 As the input rate increases, the pulse begins earlier in the season, reflecting the increasingly rapid  
265 infection of snails. At the highest input rates, a lower level of cercarial production is sustained  
266 late in the season. This effect occurs in these simulations because these input rates generate  
267 enormously high infection prevalence in snails, causing mortality and castration effects to  
268 regulate the snail population and increases *per capita* resource acquisition, and therefore  
269 cercarial production, for the few remaining snails, i.e., it causes a trophic cascade (15). This  
270 trophic cascade seems extremely ecologically unrealistic, as the prevalence of schistosome  
271 infections in snails is often extremely low (1-10%), even when prevalence in humans is high  
272 (16). In summary, across these parameter ranges, total cercarial production summed over the  
273 transmission season can be limited by miracidial input or resource productivity. However, within  
274 any scenario, cercarial production is limited at early time points by the density of infected snails  
275 and then at later time points by resource competition and the *per capita* production of cercariae.  
276

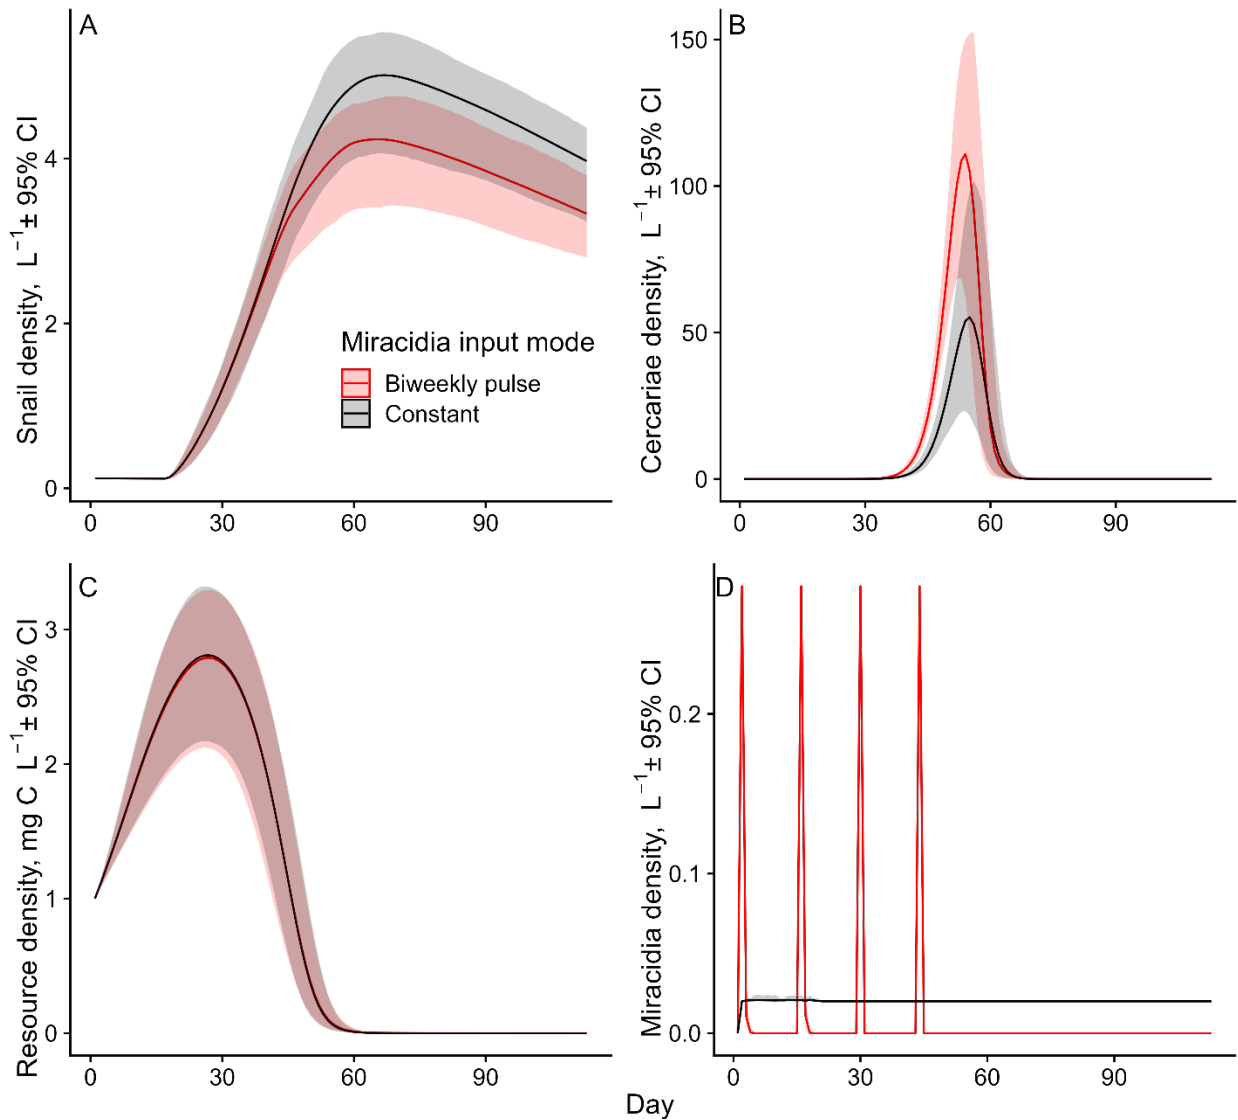

278

279 Figure S1. Simulated dynamics of (A) snails, (B) cercariae, and (C) algal resources from the  
 280 IBM for seasonal transmission scenarios when miracidia are introduced at a constant daily rate  
 281 (black) or in biweekly pulses (red) as in the experiment. Temporal variation in miracidial  
 282 introduction caused little qualitative variation in predicted dynamics. There was a slight  
 283 reduction in (A) snail density and a slight acceleration in (B) the onset of the cercarial pulse  
 284 under the biweekly miracidia input mode. This arose because this parasite input scenario slightly  
 285 accelerates host infection, e.g., because it supplies an equivalent number of parasites on day one  
 286 as the total miracidia that are supplied on days 1-14 in the constant scenario. Lines represent  
 287 mean dynamics and shaded regions represent 95% confidence intervals of sets of 50 simulation  
 288 runs using these miracidia introduction scenarios and all other model parameters and processes  
 289 as for Figure 1.  
 290

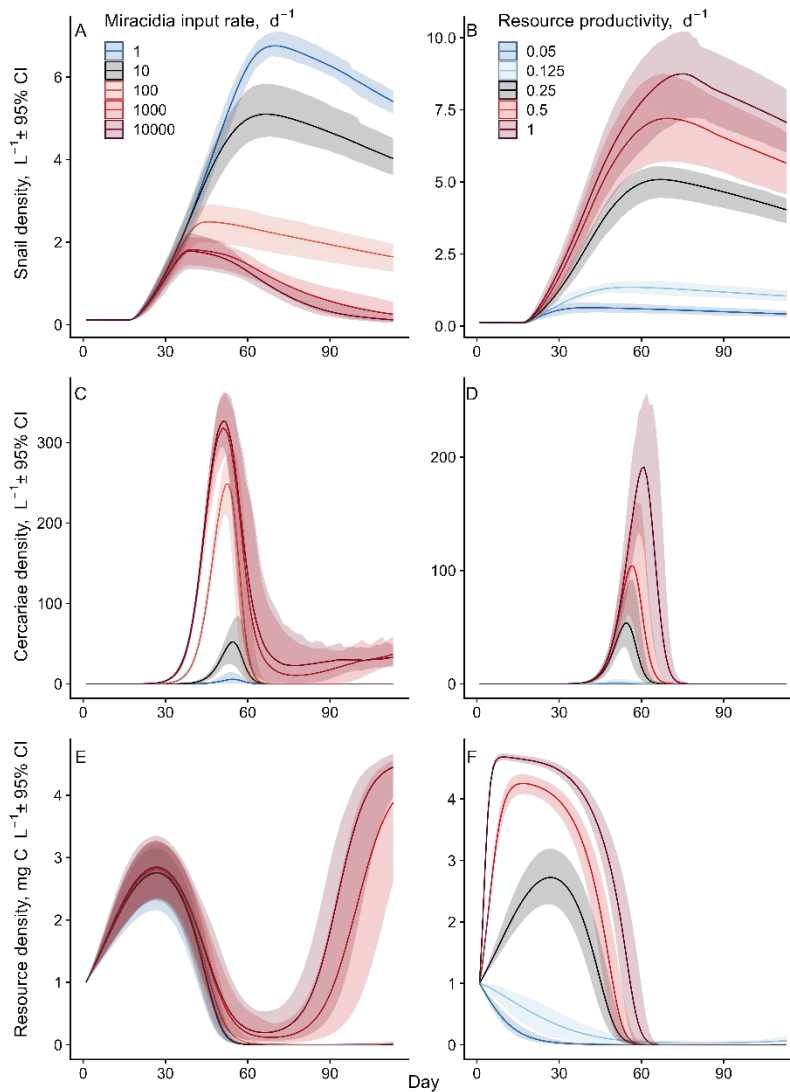

292

293 Figure S2. Simulated dynamics of (A, B) snails, (C, D) cercariae, and (E, F) algal resources from  
 294 the IBM for seasonal transmission scenarios along gradients of miracidial input rate (left  
 295 column) and maximum resource growth rate (right column). Increasing miracidial input rates  
 296 cause more infection of snails, leading to earlier onset of the pulse of cercarial production and a  
 297 larger and longer peak. Greater snail infection also suppresses snail density due to virulent  
 298 effects on host survival and reproduction. Greater resource productivity causes larger snail  
 299 populations and increases the peak and duration of the pulse in cercarial production. In all cases,  
 300 when the parameter combination facilitated production of cercariae, there was a pronounced  
 301 pulse of cercarial production as snail populations grew. Black color indicates the parameter  
 302 values presented in the main text, red color indicates parameter values greater than those used in  
 303 the main text, and blue color indicates parameter values that are less than those used in the  
 304 main text. Lines represent mean dynamics and shaded regions represent 95% confidence intervals of  
 305 sets of 50 simulation runs using these parameter values while maintaining all other model  
 306 parameters and processes as for Figure 1.

307 **Table S1. Parameters and compound functions for the bioenergetic model of within-host**  
 308 **infection dynamics.**

| <b>(A) State variables</b>           |                                                             |                                       |
|--------------------------------------|-------------------------------------------------------------|---------------------------------------|
| Quantity                             | Description                                                 | Units                                 |
| $F$                                  | Environmental resource abundance                            | mg C                                  |
| $L_i$                                | Physical host length of snail $i$                           | mm                                    |
| $e_i$                                | Scaled density of host energy reserves of snail $i$         | dimensionless                         |
| $D_i$                                | Host reserve invested in maturity/development for snail $i$ | mg C                                  |
| $R_{Hi}$                             | Host reserve invested in reproduction for snail $i$         | mg C                                  |
| $P_i$                                | Parasite biomass in snail $i$                               | mg C                                  |
| $R_{Pi}$                             | Parasite biomass invested in reproduction in snail $i$      | mg C                                  |
| <b>(B) Primary parameters (Host)</b> |                                                             |                                       |
| Quantity                             | Description                                                 | Units                                 |
| $i_M$                                | Surface area-specific maximum host ingestion rate           | mg C d <sup>-1</sup> mm <sup>-2</sup> |
| $F_h$                                | Host (Type-II) foraging half saturation constant            | mg C                                  |
| $Y_{EF}$                             | Yield of reserve on resources                               | dimensionless                         |
| $Y_{VE}$                             | Yield of structure on reserve                               | dimensionless                         |
| $\kappa$                             | Proportion of mobilized reserve allocated to soma           | dimensionless                         |
| $m_D$                                | Maintenance rate for development/maturity                   | d <sup>-1</sup>                       |

|                                                                  |                                                             |                       |
|------------------------------------------------------------------|-------------------------------------------------------------|-----------------------|
| $L_M$                                                            | Maximum physical host length                                | mm                    |
| $\chi$                                                           | Ratio of structural biomass to physical length cubed        | mg C mm <sup>-3</sup> |
| $E_M$                                                            | Maximum host reserve biomass relative to structural biomass | dimensionless         |
| $D_R$                                                            | Host maturity threshold for reproduction                    | mg C                  |
| $\varepsilon_H$                                                  | Carbon content of host offspring                            | mg C                  |
| <b>(C) Primary parameters (Parasite)</b>                         |                                                             |                       |
| <u>Quantity</u>                                                  | <u>Description</u>                                          | <u>Units</u>          |
| $Y_{AE}$                                                         | Yield of parasite assimilate on host reserve                | dimensionless         |
| $Y_{PA}$                                                         | Yield of parasite biomass on assimilate                     | dimensionless         |
| $Y_{RP}$                                                         | Yield of parasite offspring biomass on assimilate           | dimensionless         |
| $i_{PM}$                                                         | Parasite maximum mass-specific ingestion rate               | mg C d <sup>-1</sup>  |
| $e_h$                                                            | Parasite ingestion half saturation constant                 | dimensionless         |
| $p_h$                                                            | Parasite allocation half-saturation constant                | dimensionless         |
| $\alpha$                                                         | Parasite manipulation of host allocation rule               | mg C <sup>-1</sup>    |
| $m_P$                                                            | Mass-specific maintenance rate for parasites                | d <sup>-1</sup>       |
| $\varepsilon_P$                                                  | Carbon content of parasite offspring                        | mg C                  |
| <b>(D) Primary parameters (Damage, hazard, and survivorship)</b> |                                                             |                       |
| $k_R$                                                            | Damage repair rate constant                                 | d <sup>-1</sup>       |



|            |                                                  |                 |
|------------|--------------------------------------------------|-----------------|
| $\theta$   | Intensity of parasite-induced damage             | dimensionless   |
| $h_b$      | Background hazard rate                           | d <sup>-1</sup> |
| $h_\delta$ | Hazard coefficient of damage                     | d <sup>-1</sup> |
| $m_R$      | Scaled energy expenditure rate for damage repair | d <sup>-1</sup> |
| $\delta_0$ | Damage density threshold                         | dimensionless   |

**(E) Derived parameters and functions**

| <u>Equation</u>                        | <u>Description</u>                                                        | <u>Units</u>                          |
|----------------------------------------|---------------------------------------------------------------------------|---------------------------------------|
| $a_M = i_M Y_{EF}$                     | Maximum host assimilation rate                                            | mg C d <sup>-1</sup> mm <sup>-2</sup> |
| $g = \frac{1}{\kappa^* Y_{VE} E_m}$    | Cost of structural growth relative to maximum possible allocation to soma | dimensionless                         |
| $p_i = \frac{P_i}{\chi L_i^3}$         | Parasite density in host structural tissue                                | dimensionless                         |
| $r_{Pi} = \frac{p_i^2}{p_h^2 + p_i^2}$ | Proportional allocation of parasite assimilate to reproduction            | dimensionless                         |
| $Y_{PE} = Y_{PA} Y_{AE}$               | Yield of parasite biomass on host reserve                                 | dimensionless                         |

|                                                                                                                               |                                                                |                       |
|-------------------------------------------------------------------------------------------------------------------------------|----------------------------------------------------------------|-----------------------|
| $\gamma_{RP} = \frac{Y_{RP}}{Y_{PA}}$                                                                                         | Relative yield of parasite reproduction on parasite assimilate | dimensionless         |
| $C_i = \left( \frac{ge_i}{g + e_i} \right) \left( a_M L^2 + \frac{(m_V + m_R E_M \delta_i) \chi L_i^3}{\kappa_i^* g} \right)$ | Commitment/mobilization rate of reserve                        | mg C d <sup>-1</sup>  |
| $m_V = \frac{\kappa a_M}{\chi L_M}$                                                                                           | Mass-specific maintenance rate for structure                   | d <sup>-1</sup>       |
| $\mu_D = \frac{m_D}{m_V}$                                                                                                     | Scaled maturity maintenance rate                               | dimensionless         |
| $M = \chi(1 + E_M)$                                                                                                           | Volume-biomass coefficient for hosts                           | mg C mm <sup>-3</sup> |
| $\kappa_i^* = \min(\kappa + \alpha P_i, 1)$                                                                                   | Realized proportion of mobilized reserve allocated to soma     | dimensionless         |
| $f_H = \frac{F}{F_h + F}$                                                                                                     | Scaled host functional response                                | dimensionless         |
| $f_P = \frac{e_i}{e_h + e_i}$                                                                                                 | Scaled parasite functional response                            | dimensionless         |

309

310

**Table S2. Parameter estimates used in the IBM simulations**

| <b>Parameter</b>                                       | <b>Description</b>                                          | <b>Estimate<sup>1</sup></b> | <b>Units</b>                          |
|--------------------------------------------------------|-------------------------------------------------------------|-----------------------------|---------------------------------------|
| <u>Host parameters</u>                                 |                                                             |                             |                                       |
| $\kappa$                                               | Proportional allocation to soma                             | 0.908                       | -                                     |
| $M$                                                    | Mass:volume relationship                                    | $5.17 \times 10^{-3}$       | mg C mm <sup>-3</sup>                 |
| $E_M$                                                  | Maximum host reserve biomass relative to structural biomass | 1.40                        | mg C                                  |
| $L_M$                                                  | Maximum physical host length                                | 53.6                        | mm                                    |
| $i_M$                                                  | Surface area-specific maximum host ingestion rate           | $3.04 \times 10^{-2}$       | mg C d <sup>-1</sup> mm <sup>-2</sup> |
| $F_h$                                                  | Host (Type-II) foraging half saturation constant            | 2                           | mg C L <sup>-1</sup>                  |
| $Y_{EF}$                                               | Yield of reserve on resources                               | 0.269                       | -                                     |
| $Y_{VE}$                                               | Yield of structure on reserve                               | 0.261                       | -                                     |
| $\mu_D$                                                | Maintenance rate for maturity                               | 0.133                       | -                                     |
| $D_R$                                                  | Host maturity threshold for reproduction                    | 0.617                       | mg C                                  |
| $\varepsilon_H$                                        | Carbon content of host offspring                            | 0.015                       | mg C                                  |
| <i>hatch</i>                                           | Snail egg hatching probability                              | 0.5                         | -                                     |
| <i>lag</i>                                             | Time lag for snail egg hatching                             | 10                          | d                                     |
| <u>Parasite parameters</u>                             |                                                             |                             |                                       |
| $\alpha$                                               | Parasite manipulation of host allocation rule               | 2.20                        | mg C <sup>-1</sup>                    |
| $i_{PM}$                                               | Parasite maximum mass-specific ingestion rate               | 0.583                       | mg C d <sup>-1</sup>                  |
| $Y_{PE}$                                               | Yield of parasite biomass on reserve                        | 0.937                       | -                                     |
| $e_h$                                                  | Parasite ingestion half saturation constant                 | 0.220                       | -                                     |
| $m_P$                                                  | Mass-specific maintenance rate for parasites                | 0.311                       | d <sup>-1</sup>                       |
| $p_h$                                                  | Parasite allocation half-saturation constant                | 0.128                       | -                                     |
| $Y_{RP}$                                               | Yield of parasite offspring biomass on assimilate           | 0.921                       | mg C                                  |
| $\varepsilon_P$                                        | Carbon content of parasite offspring                        | $4 \times 10^{-5}$          | mg C                                  |
| <u>Damage, hazard, survival, and repair parameters</u> |                                                             |                             |                                       |
| $k_R$                                                  | Damage repair rate constant                                 | $3.09 \times 10^{-2}$       | d <sup>-1</sup>                       |
| $\delta_0$                                             | Damage density threshold                                    | $2.61 \times 10^{-2}$       | -                                     |
| $h_\delta$                                             | Hazard coefficient of damage                                | $4.73 \times 10^{-3}$       | d <sup>-1</sup>                       |
| $h_b$                                                  | Background hazard rate                                      | $3.09 \times 10^{-4}$       | d <sup>-1</sup>                       |
| $\Theta$                                               | Intensity of parasite-induced damage                        | 79.3                        | -                                     |
| $m_R$                                                  | Scaled energy expenditure rate for damage repair            | $8.06 \times 10^{-6}$       | d <sup>-1</sup>                       |
| <u>Transmission model</u>                              |                                                             |                             |                                       |
| $\varepsilon$                                          | Snail-miracidia contact rate                                | 20                          | L d <sup>-1</sup>                     |
| $\sigma$                                               | Miracidia infection probability given contact               | 0.5                         | -                                     |
| $M_{in}$                                               | Miracidial input rate                                       | 10                          | d <sup>-1</sup>                       |
| $m_M$                                                  | Mortality rate of miracidia                                 | 1                           | d <sup>-1</sup>                       |

Environmental/Resource parameters

|                      |                             |      |                      |
|----------------------|-----------------------------|------|----------------------|
| <i>ENV</i>           | Volume of environment       | 500  | L                    |
| <i>r</i>             | Algal maximum growth rate   | 0.25 | d <sup>-1</sup>      |
| <i>K</i>             | Algal carrying capacity     | 5    | mg C L <sup>-1</sup> |
| <i>M<sub>Z</sub></i> | Mortality rate of cercariae | 1    | d <sup>-1</sup>      |

- 
- 312 1. Host, parasite, and damage, hazard, survival, and repair parameters derived from  
313 Civitello et al. 2020 and rounded to three significant figures.  
314 2. Transmission model parameters rounded from estimates in Civitello and Rohr 2014  
315 3. Environmental/resource parameters chosen to reflect a 500 L volume of habitat, realistic  
316 quantities of algal growth or detrital input, and rates of parasite mortality.  
317  
318

319 **Table S3. State variables and parameters used in the SEIC simulations**

| <b>Parameter</b>       | <b>Description</b>                               | <b>Estimate</b> | <b>Units</b>    |
|------------------------|--------------------------------------------------|-----------------|-----------------|
| <u>State variables</u> |                                                  |                 |                 |
| <i>S</i>               | Susceptible snail density                        | -               | L <sup>-1</sup> |
| <i>E</i>               | Exposed snail density                            | -               | L <sup>-1</sup> |
| <i>I</i>               | Infectious snail density                         | -               | L <sup>-1</sup> |
| <i>C</i>               | Cercarial density                                | -               | L <sup>-1</sup> |
| <u>Parameters</u>      |                                                  |                 |                 |
| <i>b</i>               | Maximum snail birth rate                         | 0.1             | d <sup>-1</sup> |
| <i>K</i>               | Snail carrying capacity                          | 5               | L <sup>-1</sup> |
| $\beta M$              | Miracidia introduction & snail transmission rate | 0.01            | d <sup>-1</sup> |
| $\sigma$               | Schistosome development rate to patency          | 0.036           | d <sup>-1</sup> |
| $\lambda$              | Cercarial production rate                        | 50              | d <sup>-1</sup> |
| <i>m</i>               | Background mortality rate of snails              | 0.01            | d <sup>-1</sup> |
| <i>m<sub>I</sub></i>   | Additional mortality rate of infectious snails   | 0.04            | d <sup>-1</sup> |
| <i>m<sub>C</sub></i>   | Background mortality rate of cercariae           | 1               | d <sup>-1</sup> |

320

321

322

323

324

- 325 1. D. Gurarie, C. H. King, N. Yoon, X. Wang, R. Alsallaq, Seasonal dynamics of snail  
326 populations in coastal Kenya: Model calibration and snail control. *Advances in Water*  
327 *Resources* **108**, 397-405 (2017).
- 328 2. J. Perez-Saez *et al.*, Hydrology and density feedbacks control the ecology of  
329 intermediate hosts of schistosomiasis across habitats in seasonal climates. *Proceedings*  
330 *of the National Academy of Sciences* **113**, 6427-6432 (2016).
- 331 3. D. J. Civitello, J. R. Rohr, Disentangling the effects of exposure and susceptibility on  
332 transmission of the zoonotic parasite *Schistosoma mansoni*. *Journal of Animal Ecology*  
333 **83**, 1379-1386 (2014).
- 334 4. D. J. Civitello, L. H. Baker, S. Maduraiveeran, R. B. Hartman, Resource fluctuations inhibit  
335 the reproduction and virulence of the human parasite *Schistosoma mansoni* in its snail  
336 intermediate host. *Proceedings of the Royal Society B: Biological Sciences* **287**, 20192446  
337 (2020).
- 338 5. D. J. Civitello, H. Fatima, L. R. Johnson, R. M. Nisbet, J. R. Rohr, Bioenergetic theory  
339 predicts infection dynamics of human schistosomes in intermediate host snails across  
340 ecological gradients. *Ecology Letters* **21**, 692-701 (2018).
- 341 6. D. J. Civitello, R. B. Hartman, Size-asymmetric competition among snails disrupts  
342 production of human-infectious *Schistosoma mansoni* cercariae. *Ecology* **102**, e03383  
343 (2021).
- 344 7. M. Malishev, D. J. Civitello, Linking bioenergetics and parasite transmission models  
345 suggests mismatch between snail host density and production of human schistosomes.  
346 *Integrative and comparative biology* **59**, 1243-1252 (2019).
- 347 8. M. Malishev, D. J. Civitello, Modelling how resource competition among snail hosts  
348 affects the mollusciciding frequency and intensity needed to control human  
349 schistosomes. *Functional Ecology* <https://doi.org/10.1111/1365-2435.13602> (2020).
- 350 9. S. Kooijman, *Dynamic energy budget theory for metabolic organisation* (Cambridge  
351 university press, 2010).
- 352 10. S. R. Hall, C. Becker, C. E. Cáceres, Parasitic castration: a perspective from a model of  
353 dynamic energy budgets. *Integrative and Comparative Biology* **47**, 295-309 (2007).
- 354 11. K. D. Lafferty, A. M. Kuris, Parasitic castration: the evolution and ecology of body  
355 snatchers. *Trends in parasitology* **25**, 564-572 (2009).
- 356 12. D. Gurarie *et al.*, Modelling control of *Schistosoma haematobium* infection: predictions  
357 of the long-term impact of mass drug administration in Africa. *Parasites & Vectors* **8**, 529  
358 (2015).
- 359 13. M. E. J. Woolhouse, P. Taylor, D. Matanhire, S. K. Chandiwana, Acquired immunity and  
360 epidemiology of *Schistosoma haematobium*. *Nature* **351**, 757-759 (1991).
- 361 14. P. Zhang, Z. Feng, F. Milner, A schistosomiasis model with an age-structure in human  
362 hosts and its application to treatment strategies. *Mathematical Biosciences* **205**, 83-107  
363 (2007).
- 364 15. J. C. Buck, W. J. Ripple, Infectious agents trigger trophic cascades. *Trends in ecology &*  
365 *evolution* **32**, 681-694 (2017).
- 366 16. C. J. E. Haggerty *et al.*, Aquatic macrophytes and macroinvertebrate predators affect  
367 densities of snail hosts and local production of schistosome cercariae that cause human  
368 schistosomiasis. *PLOS Neglected Tropical Diseases* **14**, e0008417 (2020).
